# Supplementary material for: The Plasma NAD+ Metabolome Is Dysregulated in “Normal” Aging
Source: PubMed Central journal article supplement (PMC6482912; doi:10.1089/rej.2018.2077), 2019-04-23
Supplement: Supp_Fig1.pdf [file Supp_Fig1.pdf]

# Supplementary Data

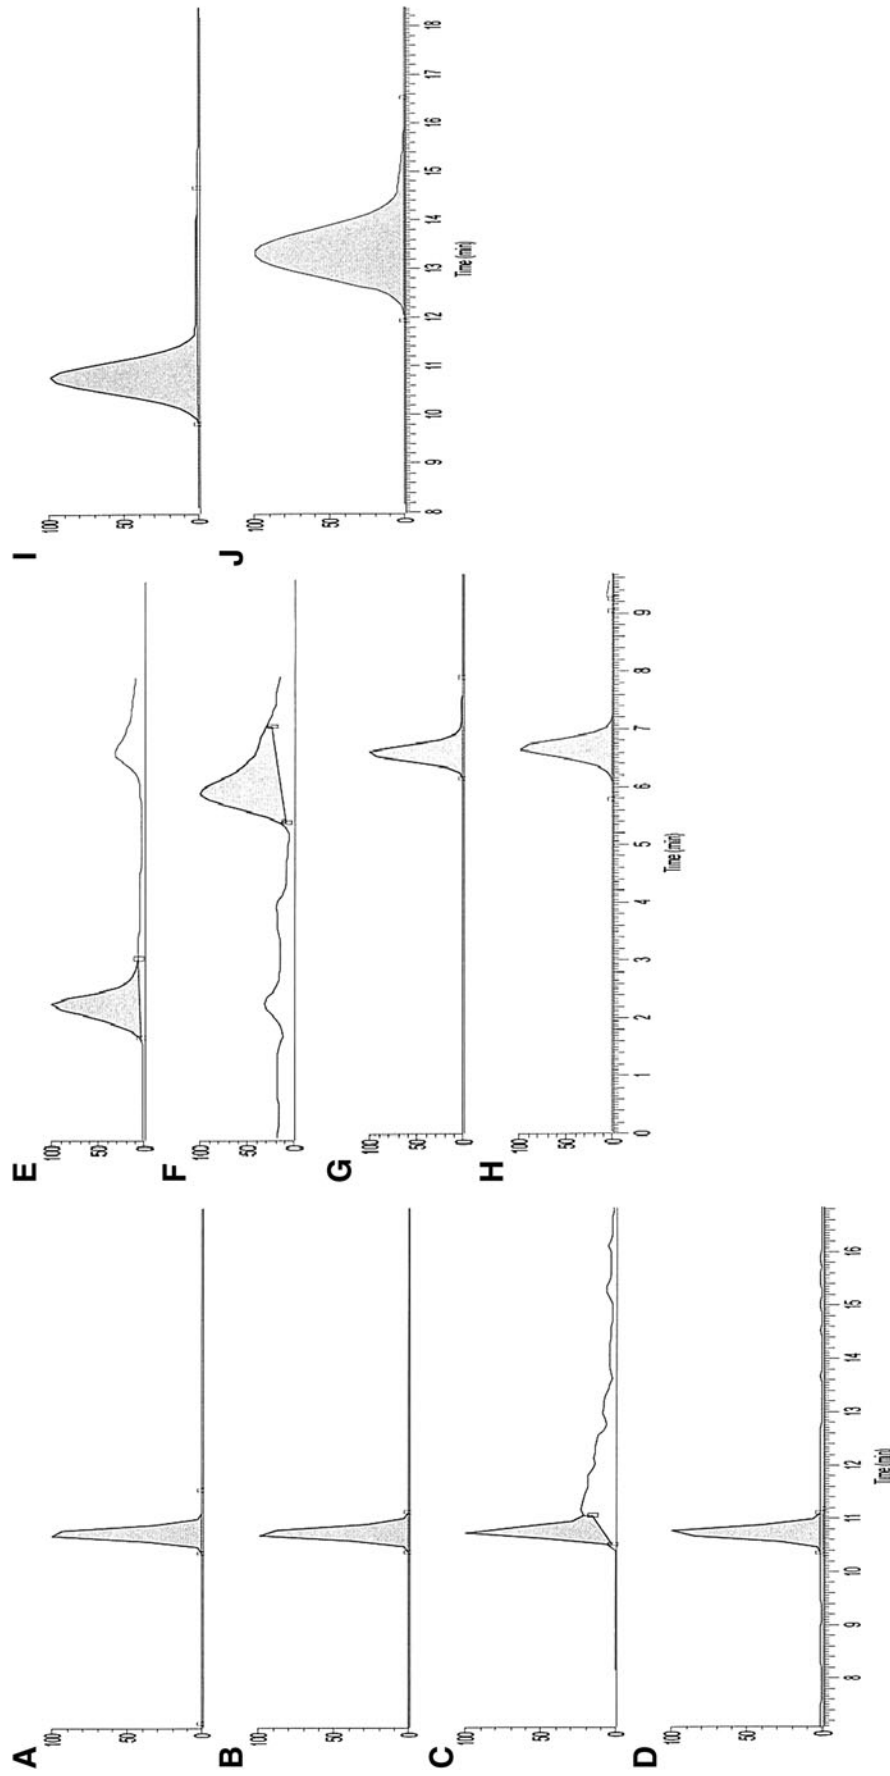

**SUPPLEMENTARY FIG. S1.** Chromatograms of metabolites of standards sample. (A) NAD<sup>+</sup>; (B) NADH; (C) ADPR; (D) NAMN; (E) NAM; (F) NA; (G) NMN; (H) NAAD; (I) NADP<sup>+</sup>; (J) NADPH.
