# Supplementary material for: The Plasma NAD+ Metabolome Is Dysregulated in “Normal” Aging
Source: PubMed Central journal article supplement (PMC6482912; doi:10.1089/rej.2018.2077), 2019-04-23
Supplement: Supp_Fig2.pdf [file Supp_Fig2.pdf]

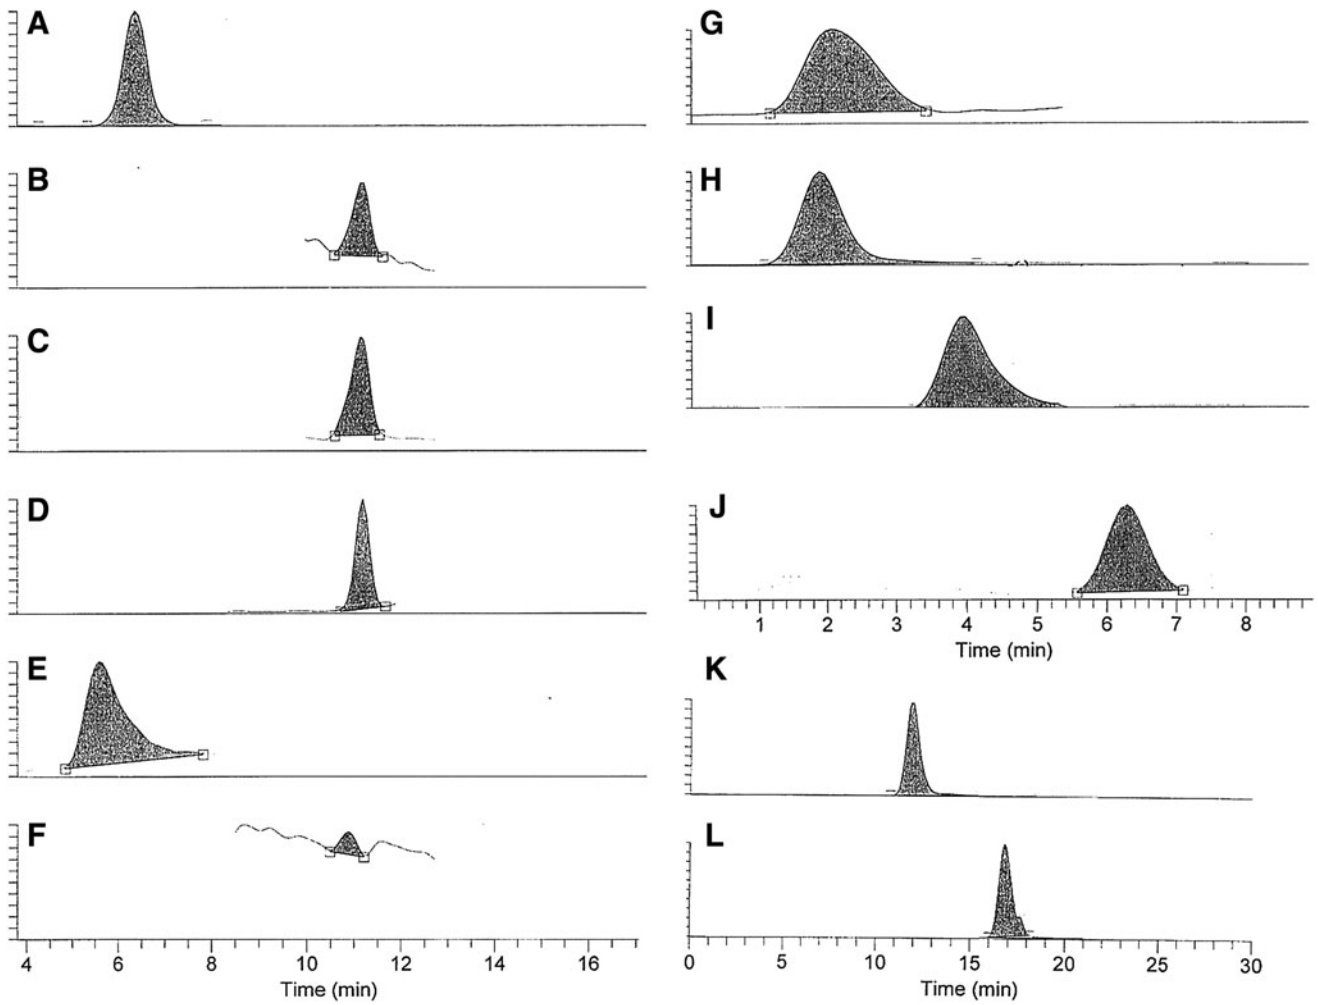

**SUPPLEMENTARY FIG. S2.** Chromatograms of metabolites in sample. (A) NAD<sup>+</sup>; (B) NAAD; (C) NADH; (D) ADPR; (E) NA; (F) NAMN; (G) NAM; (H) d4-NAM; (I) MeNAM; (J) NMN; (K) NADP<sup>+</sup>; (L) NADPH.
