# Supplementary material for: The Plasma NAD+ Metabolome Is Dysregulated in “Normal” Aging
Source: PubMed Central journal article supplement (PMC6482912; doi:10.1089/rej.2018.2077), 2019-04-23
Supplement: Supp_Table1.pdf [file Supp_Table1.pdf]

SUPPLEMENTARY TABLE S1. ASSOCIATIONS OF NAD-RELATED METABOLITES WITH GENDER

|                                        | <i>NAD+</i>        | <i>NADH</i>        | <i>NMN</i>         | <i>NAAD</i>        | <i>NAMN</i>        | <i>NA</i>          | <i>NAM</i>         | <i>MeNAM</i>       | <i>ADPR</i>        | <i>NADP</i>        | <i>NADPH</i>       | <i>NAD+;NADH</i>   | <i>NAD-;ADPR</i>   | <i>NAD+;NAM</i>    |
|----------------------------------------|--------------------|--------------------|--------------------|--------------------|--------------------|--------------------|--------------------|--------------------|--------------------|--------------------|--------------------|--------------------|--------------------|--------------------|
| Mann-Whitney <i>U</i>                  | 87.000             | 82.000             | 100.000            | 61.000             | 79.500             | 91.000             | 89.000             | 100.000            | 95.000             | 88.000             | 89.000             | 94.000             | 88.000             | 88.000             |
| Wicoxon <i>W</i>                       | 192.000            | 187.000            | 205.000            | 152.000            | 184.500            | 196.000            | 209.000            | 220.000            | 215.000            | 208.000            | 209.000            | 199.000            | 193.000            | 193.000            |
| <i>Z</i>                               | -0.786             | -1.004             | -0.220             | -1.702             | -1.130             | -0.611             | -0.698             | -0.218             | -0.436             | -0.742             | -0.698             | -0.480             | -0.742             | -0.742             |
| Asymp. sig.<br>(two-tailed)            | 0.432              | 0.315              | 0.826              | 0.089              | 0.258              | 0.541              | 0.485              | 0.827              | 0.663              | 0.458              | 0.485              | 0.631              | 0.458              | 0.458              |
| Exact sig. [two*<br>(one-tailed sig.)] | 0.451 <sup>b</sup> | 0.331 <sup>a</sup> | 0.847 <sup>a</sup> | 0.098 <sup>a</sup> | 0.270 <sup>a</sup> | 0.561 <sup>a</sup> | 0.505 <sup>a</sup> | 0.847 <sup>a</sup> | 0.683 <sup>a</sup> | 0.477 <sup>a</sup> | 0.505 <sup>a</sup> | 0.652 <sup>a</sup> | 0.477 <sup>a</sup> | 0.477 <sup>a</sup> |

<sup>a</sup>Not corrected for ties.

*ADPR*, adenosine diphosphate ribose; *MeNAM*, N-methyl-nicotinamide; *NA*, nicotinic acid; *NAAD*, nicotinic acid adenine dinucleotide; *NAD+*, nicotinamide adenine dinucleotide; *NAM*, nicotinamide; *NAMN*, nicotinic acid mononucleotide; *NMN*, nicotinamide mononucleotide.
