# Supplementary material for: The Plasma NAD+ Metabolome Is Dysregulated in “Normal” Aging
Source: PubMed Central journal article supplement (PMC6482912; doi:10.1089/rej.2018.2077), 2019-04-23
Supplement: Supp_Table2.pdf [file Supp_Table2.pdf]

SUPPLEMENTARY TABLE S2. ASSOCIATIONS  
OF NAD-RELATED METABOLITES WITH BMI

| <i>Control variables<br/>(age and gender)</i> | <i>Statistical analysis</i> | <i>BMI</i> |
|-----------------------------------------------|-----------------------------|------------|
| BMI                                           | Correlation                 | 1.000      |
|                                               | Significance (two-tailed)   | 0.000      |
|                                               | df                          | 24         |
| NAD+                                          | Correlation                 | 0.071      |
|                                               | Significance (two-tailed)   | 0.732      |
|                                               | df                          | 24         |
| NADH                                          | Correlation                 | 0.162      |
|                                               | Significance (two-tailed)   | 0.429      |
|                                               | df                          | 24         |
| NMN                                           | Correlation                 | 0.023      |
|                                               | Significance (two-tailed)   | 0.910      |
|                                               | df                          | 24         |
| NAAD                                          | Correlation                 | 0.005      |
|                                               | Significance (two-tailed)   | 0.980      |
|                                               | df                          | 24         |
| NAMN                                          | Correlation                 | 0.216      |
|                                               | Significance (two-tailed)   | 0.290      |
|                                               | df                          | 24         |
| NA                                            | Correlation                 | -0.086     |
|                                               | Significance (two-tailed)   | 0.676      |
|                                               | df                          | 24         |
| NAM                                           | Correlation                 | 0.125      |
|                                               | Significance (two-tailed)   | 0.543      |
|                                               | df                          | 24         |
| MeNAM                                         | Correlation                 | 0.597      |
|                                               | Significance (two-tailed)   | 0.001      |
|                                               | df                          | 24         |
| ADPR                                          | Correlation                 | -0.204     |
|                                               | Significance (two-tailed)   | 0.318      |
|                                               | df                          | 24         |
| NADP+                                         | Correlation                 | -0.216     |
|                                               | Significance (two-tailed)   | 0.289      |
|                                               | df                          | 24         |
| NADPH                                         | Correlation                 | -0.149     |
|                                               | Significance (two-tailed)   | 0.467      |
|                                               | df                          | 24         |
| NAD+:NADH                                     | Correlation                 | 0.102      |
|                                               | Significance (two-tailed)   | 0.621      |
|                                               | df                          | 24         |
| NAD+:ADPR                                     | Correlation                 | 0.052      |
|                                               | Significance (two-tailed)   | 0.799      |
|                                               | df                          | 24         |
| NAD+:NAM                                      | Correlation                 | -0.043     |
|                                               | Significance (two-tailed)   | 0.834      |
|                                               | df                          | 24         |

BMI, body mass index.
